# Supplementary material for: An error-tuned model for sensorimotor learning
Source: PLOS journal article supplement (doi:10.1371/journal.pcbi.1005883), 2017-12-18
Supplement: S1 (10.1371/journal.pcbi.1005883.s001) [file journal.pcbi.1005883.s001]

### Supporting Table S1 – Model Parameters and 95% Confidence Limits

Parameters for the CDM and ETM when fit to datasets obtained from the different experiments. In the first dataset (top 2 main rows for CDM and ETM), experiments 1, 2 and 3 were concurrently fit with all free model parameters. In the second dataset (bottom 2 main rows for CDM and ETM), experiments 4 and 5 were concurrently fit with the Gaussian tuning function widths fixed to values obtained from fitting the first dataset (grey backgrounds indicate the fixed tuning-width values). BIC values are relative to the best model (the ETM in both cases) within the fits for each dataset. The 95% confidence limits (CL) on parameters and  $R^2$  values were calculated from a bootstrap analysis (see Methods of the main text). P-values for model selection were calculated as the proportion of bootstrap samples in which the BIC selected the ETM (see Methods and Table 1 of the main text for more details).

| Model  | Exp's | DoF | $\alpha_0$ | $\alpha_{180}$ | $\beta_0$ | $\beta_{180}$ | $\sigma_\alpha$ | $\sigma$ | $C_{180}$ | $\alpha_a$ | $\beta_a$ | $C_a$  | $R^2$ | $\Delta BIC$ |
|--------|-------|-----|------------|----------------|-----------|---------------|-----------------|----------|-----------|------------|-----------|--------|-------|--------------|
| CDM    | 1,2,3 | 6   | 0.9857     | 0.9981         | 0.1429    | 0.0001        | 50.8            | 31.1     | -         | -          | -         | -      | 0.87  | 122.0        |
| 95% CL |       |     | 0.9810     | 0.9947         | 0.1031    | 0.0001        | 33.3            | 25.4     | -         | -          | -         | -      | 0.75  | -            |
|        |       |     | 0.9899     | 0.9999         | 0.1817    | 0.0225        | 71.5            | 49.3     |           |            |           |        | 0.86  |              |
| ETM    | 1,2,3 | 7   | 0.9783     | 0.9960         | 0.1095    | 0.0225        | 38.9            | 14.5     | 0.0323    | -          | -         | -      | 0.88  | 0.0          |
| 95% CL |       |     | 0.9512     | 0.9929         | 0.0622    | 0.0001        | 8.1             | 11.7     | 0.0000    | -          | -         | -      | 0.77  | p=0.0150     |
|        |       |     | 0.9815     | 0.9983         | 0.1563    | 0.0593        | 58.5            | 39.9     | 0.2449    |            |           |        | 0.87  |              |
| CDM    | 4,5   | 7   | 0.9731     | 0.9888         | 0.1826    | 0.0001        | 50.8            | 31.1     | -         | 0.9895     | 0.0130    | 0.3769 | 0.88  | 287.3        |
| 95% CL |       |     | 0.9538     | 0.9851         | 0.0887    | 0.0001        | -               | -        | -         | 0.9800     | 0.0109    | 0.3369 | 0.75  | -            |
|        |       |     | 0.9925     | 0.9918         | 0.2535    | 0.0005        |                 |          |           | 0.9969     | 0.0240    | 0.3790 | 0.86  |              |
| ETM    | 4,5   | 8   | 0.9720     | 0.9957         | 0.1659    | 0.0222        | 38.9            | 14.5     | 0.1011    | 0.9895     | 0.0131    | 0.4285 | 0.90  | 0.0          |
| 95% CL |       |     | 0.9517     | 0.9914         | 0.0990    | 0.0058        | -               | -        | 0.0410    | 0.9851     | 0.0100    | 0.3847 | 0.78  | p<0.0001     |
|        |       |     | 0.9881     | 0.9999         | 0.2103    | 0.0466        |                 |          | 0.1739    | 0.9965     | 0.0860    | 0.4924 | 0.88  |              |
